# Supplementary material
Source: HighWire-hosted journal article supplement (https://bmjopen.bmj.com/content/9/1/e023004)
Supplement: inline-supplementary-material-2 [file inline-supplementary-material-2.pdf]

**Appendix Table 1.** Severe neonatal morbidity components and ICD-9-CM codes.

| <b>Neonatal morbidity</b>                                                                                                                                     | <b>ICD-9-CM code</b> |
|---------------------------------------------------------------------------------------------------------------------------------------------------------------|----------------------|
| <b>Bronchopulmonary dysplasia</b>                                                                                                                             | 770.7                |
| <b>Intraventricular hemorrhage</b>                                                                                                                            |                      |
| Grade III – bleeding with enlargement of ventricle                                                                                                            | 772.13               |
| Grade IV – bleeding into cerebral cortex                                                                                                                      | 772.14               |
| <b>Periventricular leukomalacia</b>                                                                                                                           | 779.7                |
| <b>Retinopathy of prematurity</b>                                                                                                                             | 362.2                |
| <b>Necrotizing enterocolitis</b>                                                                                                                              | 777.5                |
| <b>Sepsis</b>                                                                                                                                                 |                      |
| Septicemia of newborn                                                                                                                                         | 771.81               |
| <b>Convulsions</b>                                                                                                                                            |                      |
| Fits in newborn; seizures in newborn                                                                                                                          | 779.0                |
| <b>Severe birth trauma</b>                                                                                                                                    |                      |
| Subdural and cerebral hemorrhage (whether described as due to birth trauma or to intrapartum anoxia or hypoxia; subdural hematoma (localized); tentorial tear | 767.0                |
| Epicranial subaponeurotic hemorrhage (massive); subgaleal hemorrhage                                                                                          | 767.11               |
| Injury to spine and spinal cord including:                                                                                                                    | 767.4                |
| Dislocation of spine or spinal cord due to birth trauma                                                                                                       |                      |
| Fracture of spine or spinal cord due to birth trauma                                                                                                          |                      |
| Laceration of spine or spinal cord due to birth trauma                                                                                                        |                      |
| Rupture of spine or spinal cord due to birth trauma                                                                                                           |                      |

**Appendix Figure 1.** Study population flow chart, Washington State, U.S.A., 2004-2013.

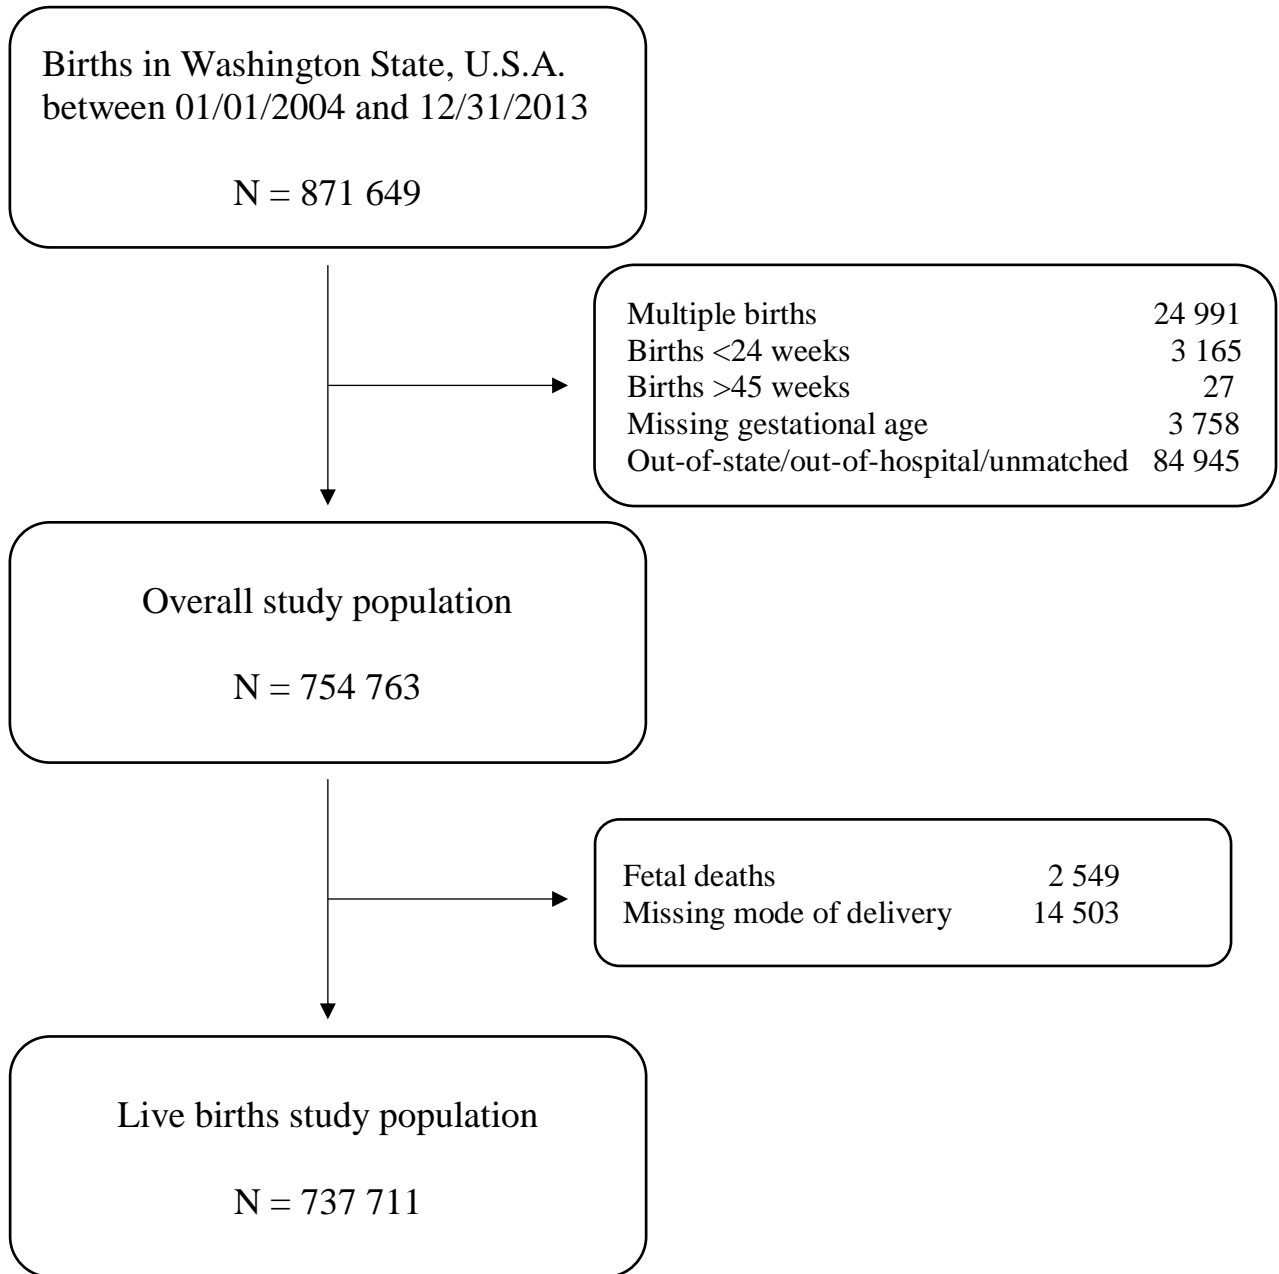

**Appendix Figure 2.** Gestational age-specific rates of stillbirths calculated using the fetuses-at-risk (FAR) approach, Washington State, U.S.A., 2004-2013.

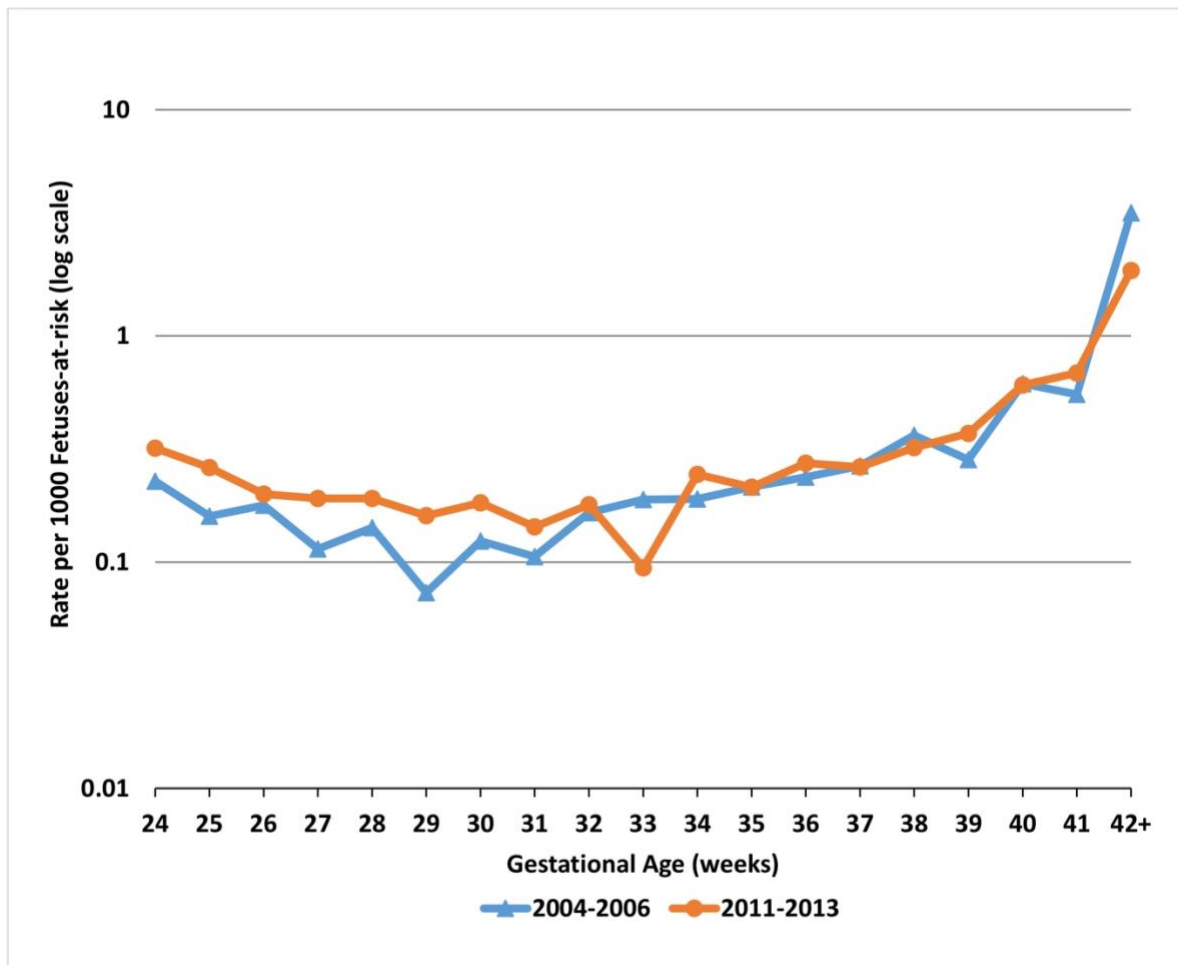

**Appendix Table 2.** Preterm live births by gestational age categories and clinical subtype, Washington State, U.S.A., 2004-2013.

| <b>Gestational age and clinical preterm birth subtype</b> | <b>All Years (2004-2013)</b> | <b>Period 1 (2004-2006)</b> | <b>Period 2 (2011-2013)</b> | <b>p-value* (Period 2 vs. Period 1)</b> |
|-----------------------------------------------------------|------------------------------|-----------------------------|-----------------------------|-----------------------------------------|
| 24-27 weeks                                               | 1 833                        | 489                         | 598                         | <0.001                                  |
| PPROM                                                     | 509 (27.8)                   | 181 (37.0)                  | 130 (21.7)                  |                                         |
| Spontaneous labor                                         | 532 (29.0)                   | 135 (27.6)                  | 189 (31.6)                  |                                         |
| Iatrogenic                                                | 792 (43.2)                   | 173 (35.4)                  | 279 (46.7)                  |                                         |
| 28-31                                                     | 4 095                        | 1 135                       | 1 357                       | <0.001                                  |
| PPROM                                                     | 909 (22.2)                   | 295 (26.0)                  | 264 (19.5)                  |                                         |
| Spontaneous labor                                         | 1 255 (30.6)                 | 357 (31.5)                  | 416 (30.7)                  |                                         |
| Iatrogenic                                                | 1 931 (47.2)                 | 483 (42.6)                  | 677 (49.9)                  |                                         |
| 32-33                                                     | 5 664                        | 1 469                       | 1 848                       | 0.006                                   |
| PPROM                                                     | 1 288 (22.7)                 | 383 (26.1)                  | 410 (22.2)                  |                                         |
| Spontaneous labor                                         | 1 988 (35.1)                 | 530 (36.1)                  | 649 (35.1)                  |                                         |
| Iatrogenic                                                | 2 388 (42.2)                 | 556 (37.8)                  | 789 (42.7)                  |                                         |
| 34-36                                                     | 40 422                       | 12 249                      | 11 821                      | 0.001                                   |
| PPROM                                                     | 5 809 (14.4)                 | 1 912 (15.6)                | 1 673 (14.2)                |                                         |
| Spontaneous labor                                         | 18 973 (46.9)                | 5 770 (47.1)                | 5 530 (46.8)                |                                         |
| Iatrogenic                                                | 15 640 (38.7)                | 4 567 (37.3)                | 4 618 (39.1)                |                                         |
| All (24-36)                                               | 52 014                       | 15 342                      | 15 624                      | <0.001                                  |
| PPROM                                                     | 8 515 (16.4)                 | 2 771 (18.1)                | 2 477 (15.9)                |                                         |
| Spontaneous labor                                         | 22 748 (43.7)                | 6 792 (44.3)                | 6 784 (43.4)                |                                         |
| Iatrogenic                                                | 20 751 (39.9)                | 5 779 (37.7)                | 6 363 (40.7)                |                                         |

PPROM, preterm premature rupture of membranes

\* p-value for Chi-square test comparing Period 1 and 2

**Appendix Table 3** Gestational age-specific rates of adverse neonatal outcomes among singleton preterm infants, Washington State, U.S.A., 2004-2013.

| Outcome and gestational age category        | Rates per 100 live births |              |                          |
|---------------------------------------------|---------------------------|--------------|--------------------------|
|                                             | N (Rate)                  |              | Rate difference (95% CI) |
|                                             | 2004-2006                 | 2011-2013    |                          |
| <b>Neonatal death</b>                       |                           |              |                          |
| 24-27 weeks                                 | 76 (15.5)                 | 85 (14.2)    | -1.33 (-5.59, 2.93)      |
| 28-31                                       | 55 (4.9)                  | 40 (3.0)     | -1.90 (-3.44, -0.36)     |
| 32-33                                       | 23 (1.6)                  | 18 (1.0)     | -0.59 (-1.37, 0.19)      |
| 34-36                                       | 43 (0.4)                  | 64 (0.5)     | +0.19 (0.02, 0.36)       |
| All (24-36)                                 | 197 (1.3)                 | 207 (1.3)    | +0.04 (-0.21, 0.29)      |
| <b>Neonatal death/<br/>severe morbidity</b> |                           |              |                          |
| 24-27 weeks                                 | 353 (72.2)                | 429 (71.7)   | -0.45 (-5.82, 4.92)      |
| 28-31                                       | 383 (33.7)                | 496 (36.6)   | +2.81 (-0.95, 6.57)      |
| 32-33                                       | 166 (11.3)                | 302 (16.3)   | +5.04 (2.70, 7.38)       |
| 34-36                                       | 307 (2.5)                 | 639 (5.4)    | +2.90 (2.41, 3.39)       |
| All (24-36)                                 | 1 209 (7.9)               | 1 866 (11.9) | +4.06 (3.40, 4.73)       |

CI, confidence interval; severe morbidity includes BPD, IVH grade $\geq$ 3, PVL, ROP, NEC, neonatal sepsis, convulsions of newborn, and severe birth trauma.

**Appendix Table 4.** Temporal trends in gestational-specific rates of severe neonatal morbidity components, Washington State, U.S.A., 2004-2013.

| Neonatal Morbidity            | Rates of Outcome by Period<br>[N (per 100 live births)] |             | Adjusted Odds<br>Ratio†<br>(95% CI) |
|-------------------------------|---------------------------------------------------------|-------------|-------------------------------------|
|                               | 2004-2006                                               | 2011-2013   |                                     |
| <b>All PTB (24-36 weeks)</b>  |                                                         |             |                                     |
| BPD                           | 306 (2.0)                                               | 269 (1.7)   | <b>0.95 (0.93-0.98)</b>             |
| IVH (grade $\geq 3$ )         | 72 (0.5)                                                | 61 (0.4)    | <b>0.95 (0.90-1.00)</b>             |
| PVL                           | 13 (0.1)                                                | 27 (0.2)    | 1.10 (1.00-1.22)                    |
| ROP                           | 60 (0.4)                                                | 86 (0.6)    | 1.02 (0.98-1.07)                    |
| NEC                           | 129 (0.8)                                               | 173 (1.1)   | 1.02 (0.99-1.06)                    |
| Sepsis                        | 686 (4.5)                                               | 1 331 (8.5) | <b>1.09 (1.08-1.11)</b>             |
| Convulsions                   | 53 (0.4)                                                | 62 (0.4)    | 1.00 (0.94-1.04)                    |
| Severe birth trauma           | 29 (0.2)                                                | 26 (0.2)    | 0.96 (0.89-1.04)                    |
| <b>Late PTB (34-36 weeks)</b> |                                                         |             |                                     |
| BPD                           | 6 (0.1)                                                 | 4 (0.0)     | 0.96 (0.81-1.12)                    |
| IVH (grade $\geq 3$ )         | 3 (0.0)                                                 | 3 (0.0)     | 0.97 (0.78-1.21)                    |
| PVL                           | 0 (0.0)                                                 | 0 (0.0)     | 1.05 (0.64-1.72)                    |
| ROP                           | 0 (0.0)                                                 | 2 (0.0)     | 1.56 (0.85-2.87)                    |
| NEC                           | 16 (0.1)                                                | 21 (0.2)    | 1.04 (0.95-1.14)                    |
| Sepsis                        | 211 (1.7)                                               | 530 (4.5)   | <b>1.12 (1.10-1.14)</b>             |
| Convulsions                   | 26 (0.2)                                                | 28 (0.2)    | 1.01 (0.93-1.09)                    |
| Severe birth trauma           | 16 (0.1)                                                | 14 (0.1)    | 0.97 (0.87-1.08)                    |
| <b>PTB at 28-33 weeks</b>     |                                                         |             |                                     |
| BPD                           | 121 (4.7)                                               | 95 (3.0)    | <b>0.93 (0.89-0.97)</b>             |
| IVH (grade $\geq 3$ )         | 24 (0.9)                                                | 19 (0.6)    | 0.92 (0.84-1.01)                    |
| PVL                           | 8 (0.3)                                                 | 15 (0.5)    | 1.06 (0.93-1.21)                    |
| ROP                           | 35 (1.3)                                                | 63 (2.0)    | 1.05 (0.99-1.11)                    |
| NEC                           | 76 (2.9)                                                | 89 (2.8)    | 1.00 (0.95-1.05)                    |
| Sepsis                        | 306 (11.8)                                              | 554 (17.3)  | <b>1.07 (1.05-1.10)</b>             |
| Convulsions                   | 19 (0.7)                                                | 20 (0.6)    | 0.96 (0.87-1.05)                    |
| Severe birth trauma           | 9 (0.4)                                                 | 9 (0.3)     | 0.95 (0.82-1.11)                    |
| <b>PTB at 24-27 weeks</b>     |                                                         |             |                                     |

|                       |            |            |                         |
|-----------------------|------------|------------|-------------------------|
| BPD                   | 179 (36.6) | 170 (28.4) | 0.97 (0.94-1.01)        |
| IVH (grade $\geq 3$ ) | 45 (9.2)   | 39 (6.5)   | 0.95 (0.88-1.01)        |
| PVL                   | 5 (1.0)    | 12 (2.0)   | 1.13 (0.96-1.32)        |
| ROP                   | 25 (5.1)   | 21 (3.5)   | 0.95 (0.87-1.02)        |
| NEC                   | 37 (7.6)   | 63 (10.5)  | 1.04 (0.98-1.10)        |
| Sepsis                | 169 (34.6) | 247 (41.3) | <b>1.05 (1.01-1.09)</b> |
| Convulsions           | 8 (1.6)    | 14 (2.3)   | 1.02 (0.91-1.14)        |
| Severe birth trauma   | 4 (0.8)    | 3 (0.5)    | 0.94 (0.76-1.15)        |

CI, confidence interval; PTB, preterm birth; BPD, bronchopulmonary dysplasia; IVH, intraventricular hemorrhage; PVL, periventricular leukomalacia; ROP, retinopathy of prematurity; NEC, necrotizing enterocolitis.

Adjusted odds ratios express the average annual change in the odds for each morbidity.

Bolded value indicates statistical significance at  $p < 0.05$

†Calendar year was modelled as a continuous variable; adjusted for temporal changes in maternal age, BMI, race, education, smoking, marital status, parity, chronic hypertension, pre-pregnancy diabetes, assisted conception, health insurance provider, gestational age, SGA infant, sex, and congenital anomalies. NOTE: some covariates were excluded from the regression models due to collinearity.
